# Supplementary material for: Type VI secretion system MIX‐effectors carry both antibacterial and anti‐eukaryotic activities
Source: PubMed Central journal article supplement (PMC5666596; doi:10.15252/embr.201744226), 2017-09-14
Supplement: EMBR-18-1978-s002.pdf [file EMBR-18-1978-s002.pdf]

## Expanded View Figures

**Figure EV1. Vpr01570 is a functional anti-eukaryotic toxin.**

- A Confocal micrograph of HeLa cells transfected with vectors expressing the indicated proteins. Cells were stained for F-actin and DNA using rhodamine-phalloidin (red) and Hoechst stain (blue), respectively. Scale bar = 30  $\mu\text{m}$ ; sfGFP, superfolder green fluorescent protein. Arrowheads mark actin ruffles.
- B Growth of BY4741 yeast containing vectors for galactose-inducible expression of indicated proteins on repressing (glucose) and inducing (galactose) plates. Yeast were spotted in 10-fold serial dilutions. VopR<sup>A90/CA</sup> is a truncated and catalytically inactive form of the *Vibrio parahaemolyticus* type III effector VopR and serves as a non-toxic control.
- C, D Immunoblot using anti-GFP (C) or anti-Myc (D) antibodies to verify expression of proteins used in (A) and (B), respectively. In (C), black arrow marks expected size of Vpr01570-sfGFP fusions and white arrow marks expected size of sfGFP. In (D), black arrow marks the expected size of Vpr01570-myc, and white arrow marks the expected size of VopR<sup>A90/CA</sup>-eGFP fusion. LC, loading control.

Source data are available online for this figure.

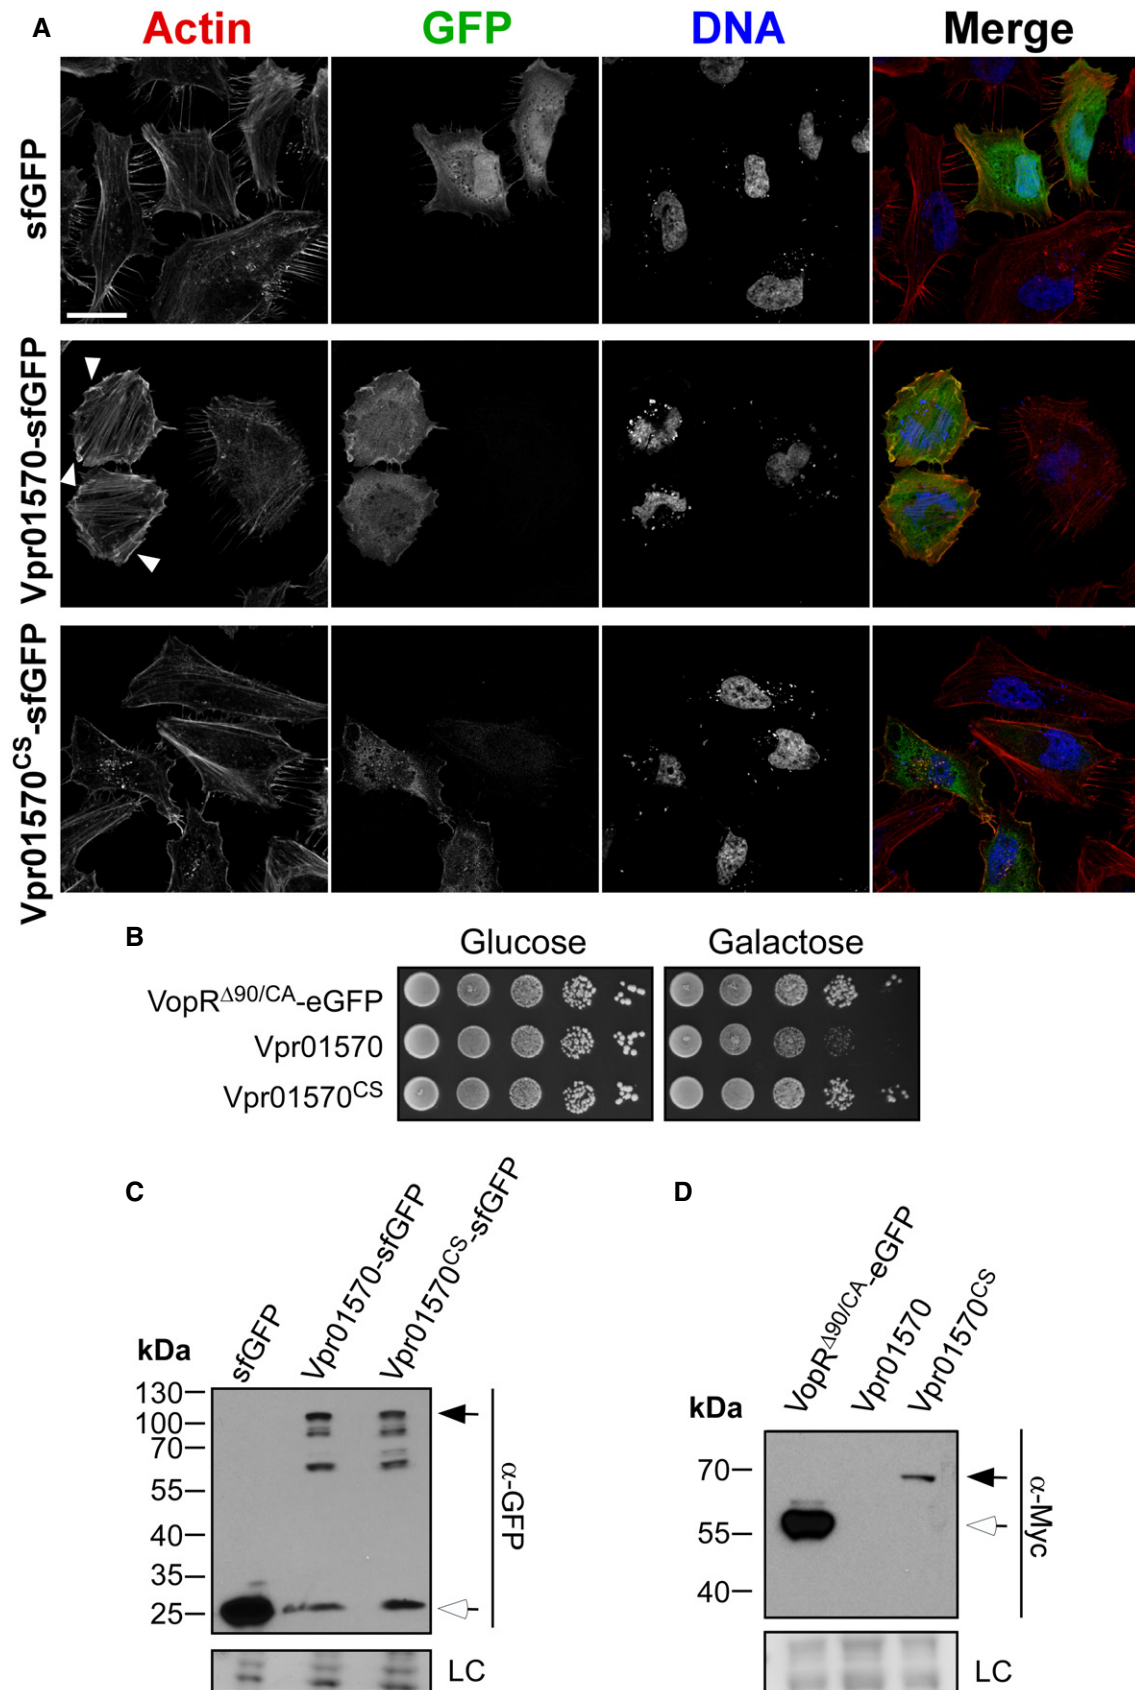

Figure EV1.

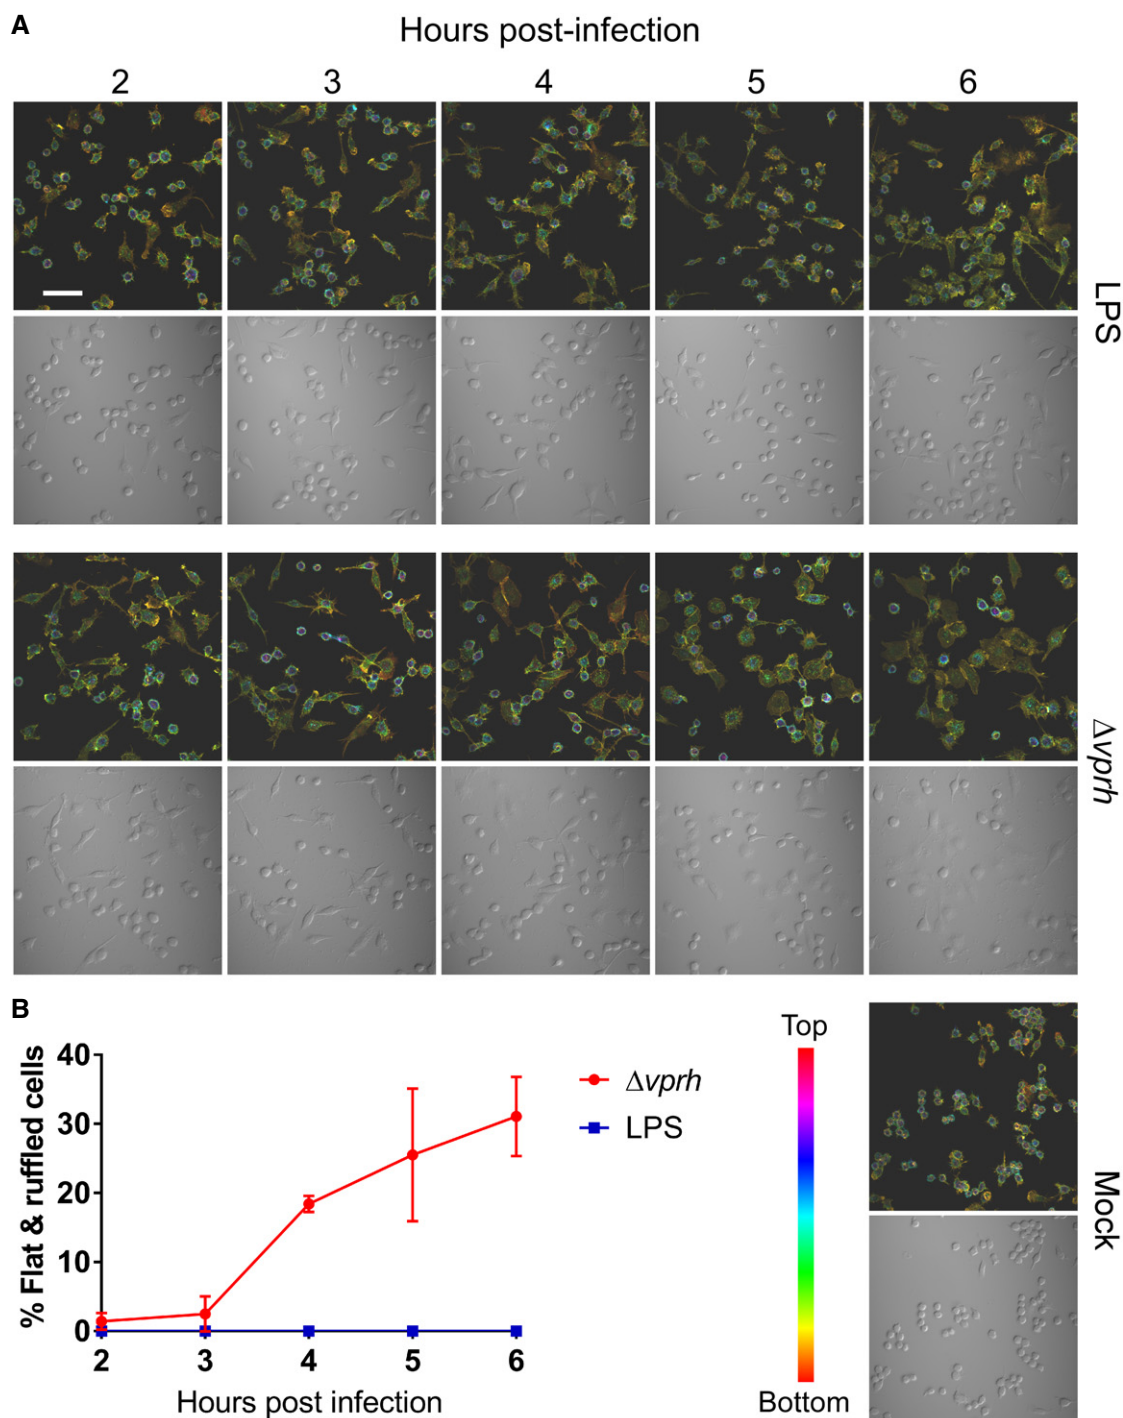

**Figure EV2. Vpr-induced morphological changes in macrophages begin 4 h post-infection.**

A Confocal micrograph of RAW 264.7 cells infected with *Vpr*  $\Delta vpr$  strain at MOI = 25 or treated with LPS (0.1  $\mu\text{g/ml}$ ) for the indicated times. Cells were stained for F-actin using rhodamine-phalloidin. Top panels show fluorescence images. F-actin is color-coded to show cell depth in the z-axis. Bottom panels show DIC of same fields of view. Scale bar = 50  $\mu\text{m}$ .

B Quantification of percentage of infected cells presenting a flatten and ruffled morphology during *Vpr* infection or LPS treatment as in (A). Results shown as mean percentage of cells in a field  $\pm$  standard deviation ( $n = 3$ , minimum number of cells per field is 41; maximum number of cells per field is 95). Experiment was performed three times, and a representative result is shown.

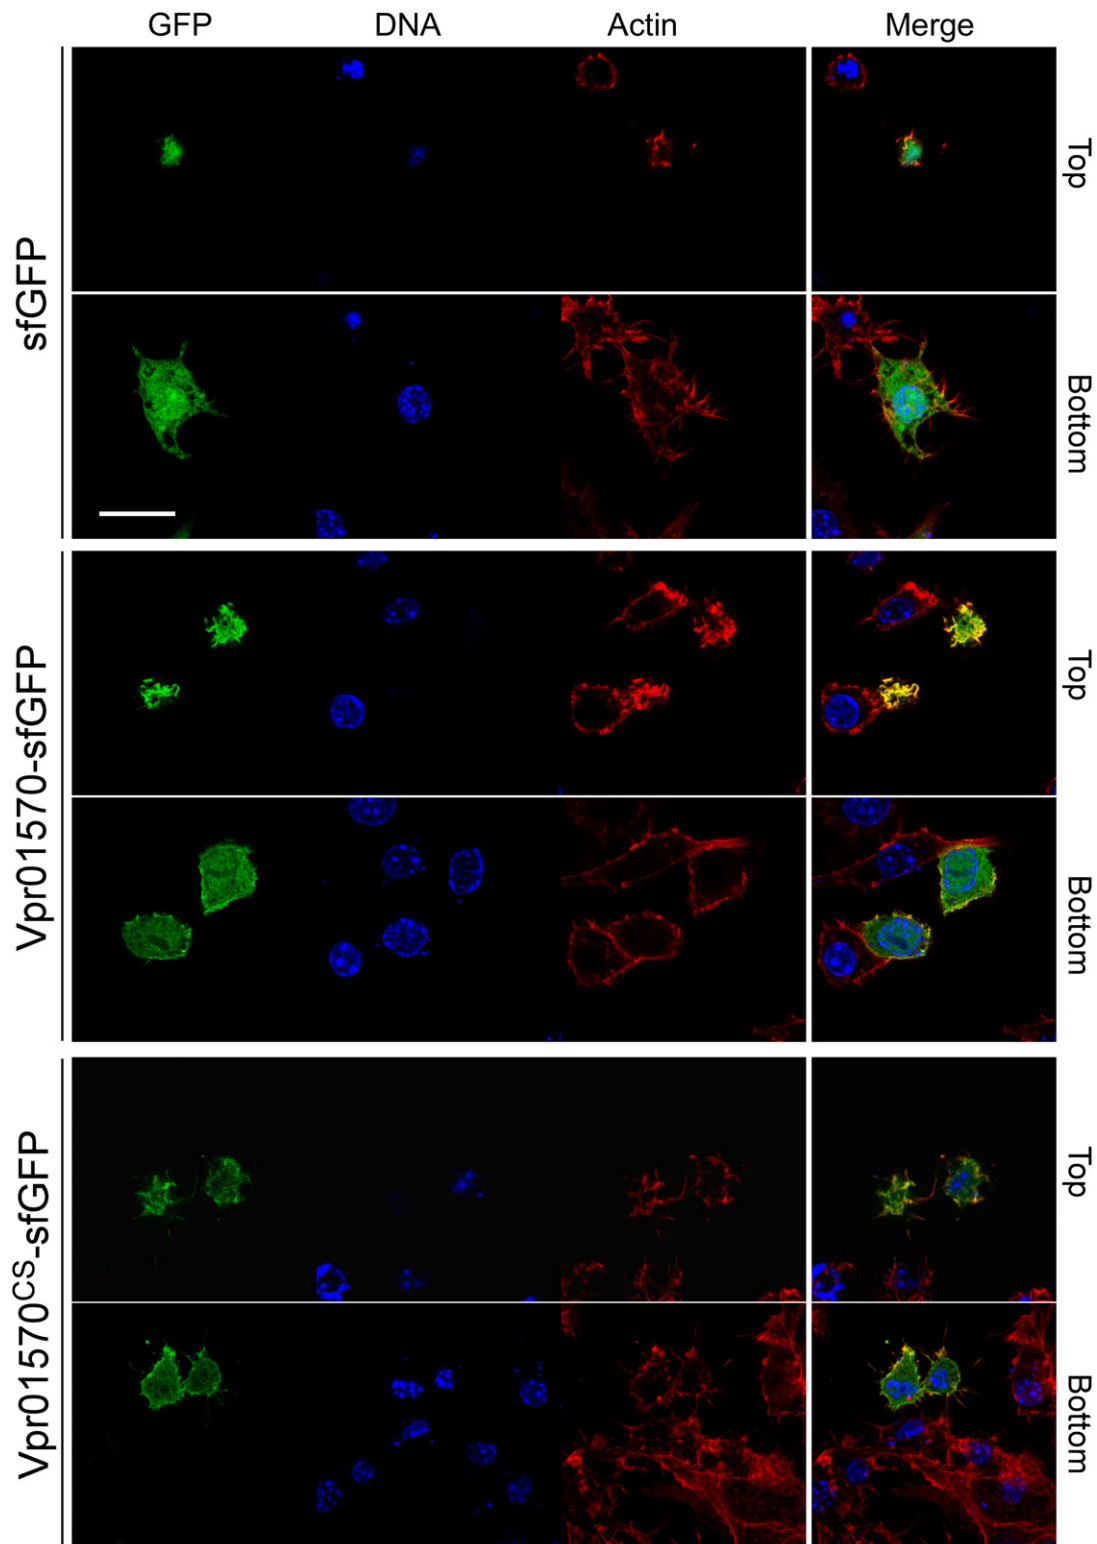

**Figure EV3.** Vpr01570 is sufficient to induce actin ruffles in macrophages.

Confocal micrograph of RAW 264.7 cells transfected with vectors expressing the indicated proteins. Cells were stained for F-actin and DNA using rhodamine-phalloidin (red) and Hoechst stain (blue), respectively. Top panels show a focal plane at the top of the cells; bottom panels show a focal plane located at the bottom of the cells. Scale bar = 20  $\mu\text{m}$ ; sfGFP, superfolder green fluorescent protein.
