# Supplementary material for: Type VI secretion system MIX‐effectors carry both antibacterial and anti‐eukaryotic activities
Source: PubMed Central journal article supplement (PMC5666596; doi:10.15252/embr.201744226), 2017-09-14
Supplement: EMBR-18-1978-s004.pdf [file EMBR-18-1978-s004.pdf]

**Figure 3D**

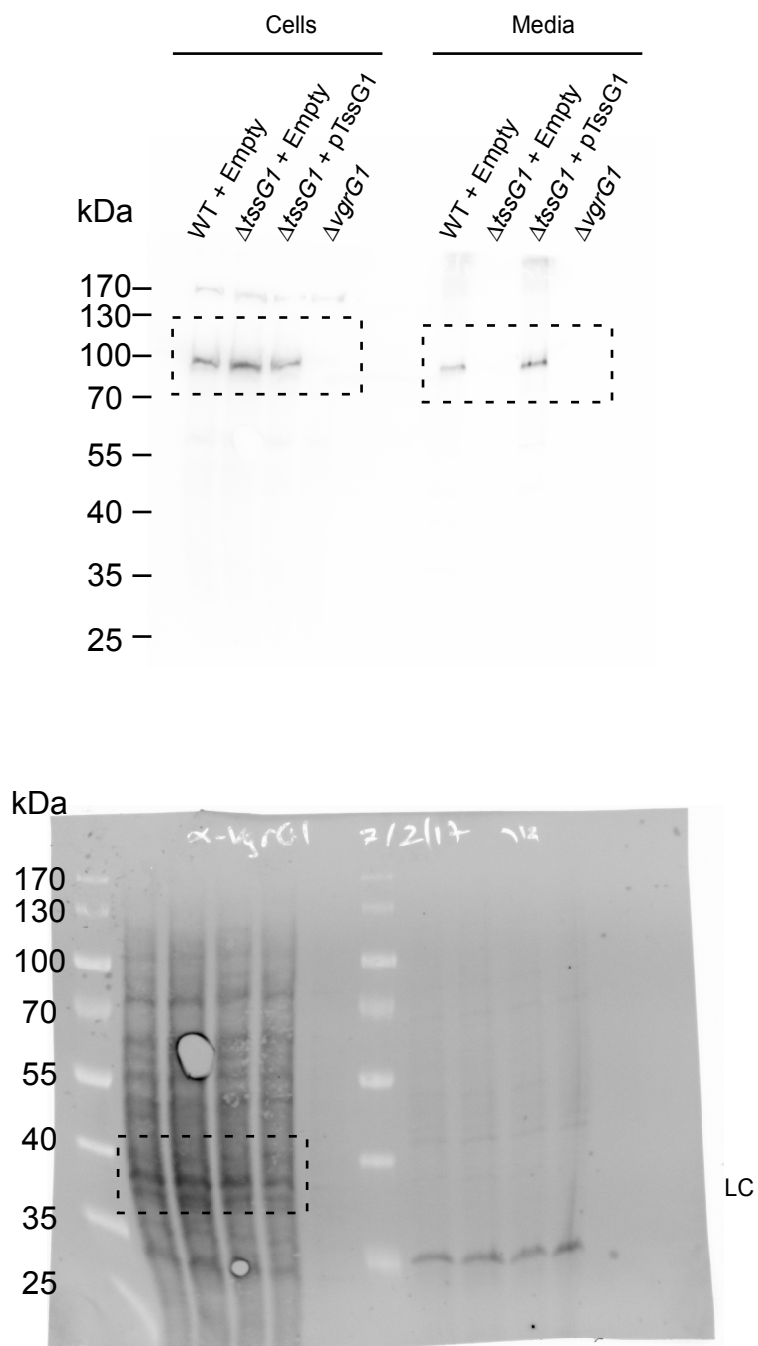

Images were acquired using a Vilber Lourmat Fusion FX-6 imager
